# Supplementary material
Source: MDPI journal article supplement (https://www.mdpi.com/2227-9717/7/7/455)
Supplement: s1 [file s1]

Supplementary Material

# Effect of Dissolved Organic Matter on Agglomeration and Removal of CuO Nanoparticles by Coagulation

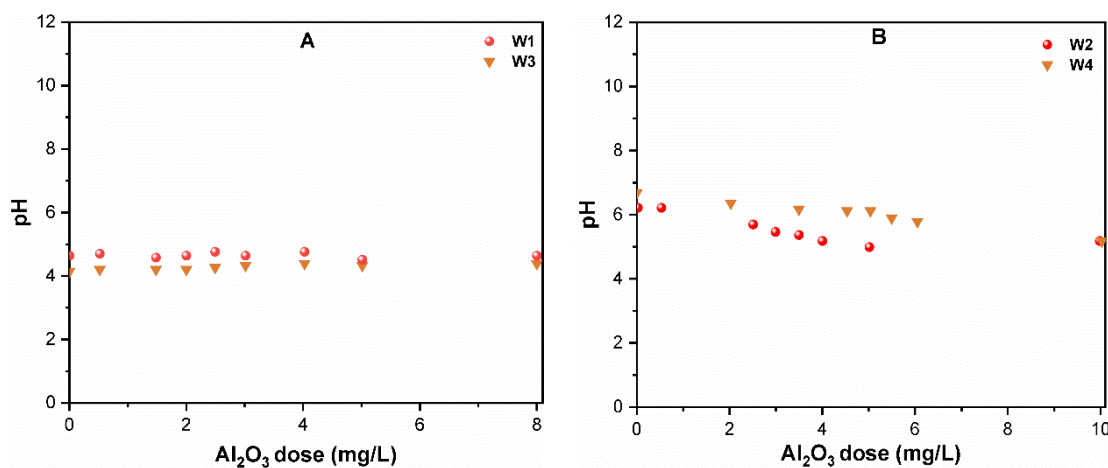

Figure. S1. Difference of water pH with added coagulant for: (A) hydrophilic; (B) hydrophobic waters
